# Supplementary figures and images for: miRNA expression profiling of formalin-fixed paraffin-embedded (FFPE) hereditary breast tumors
Source: PubMed Central journal article supplement — Genom Data. 2014 Nov 22;3:75–9. doi: 10.1016/j.gdata.2014.11.008 (PMC4535901; doi:10.1016/j.gdata.2014.11.008), 2014-11-22

**BX\_06T264\_14110823**

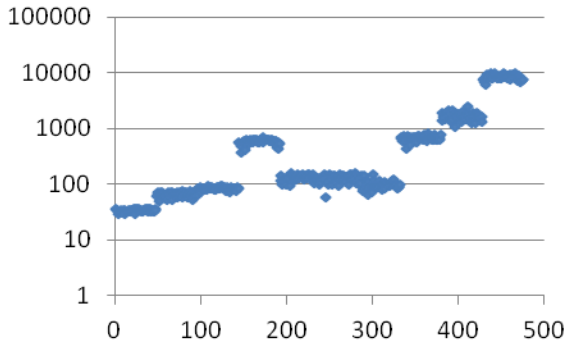

**B2\_02T59-2\_14110826**

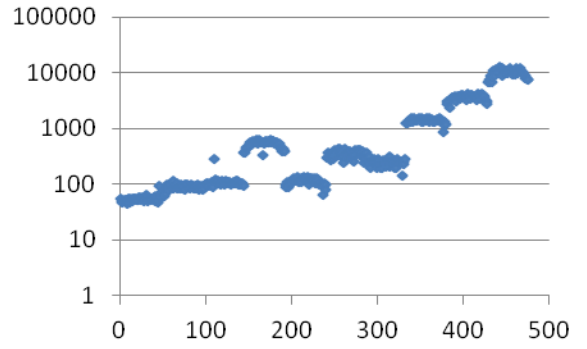

**BX\_06T253\_14110827**

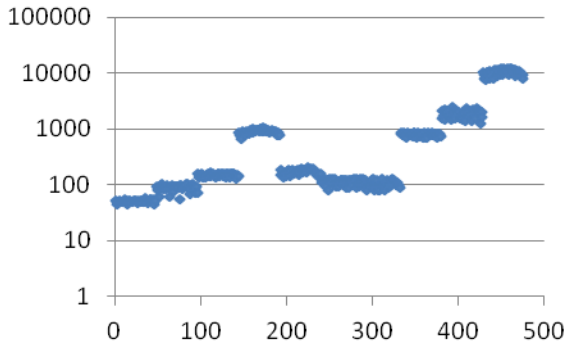

**BX\_02T31\_14110828**

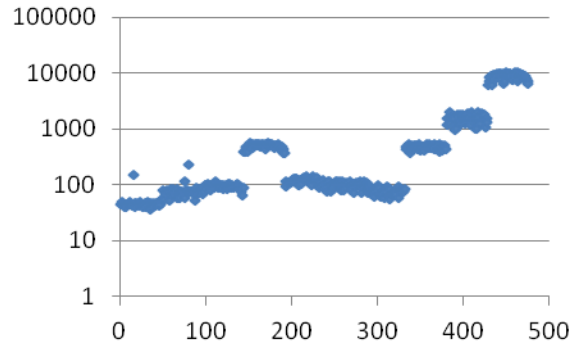

**B2\_03T239-2\_14110829**

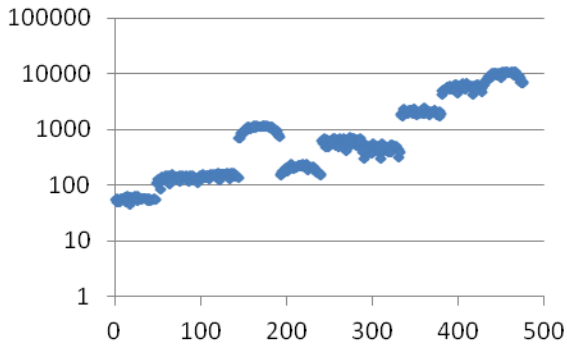

**B2\_04T329\_14110830**

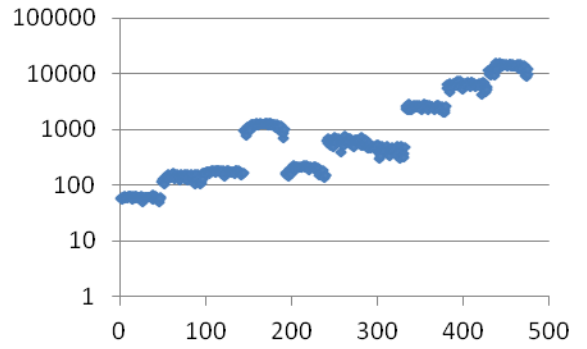

**B2\_03T168\_14110831**

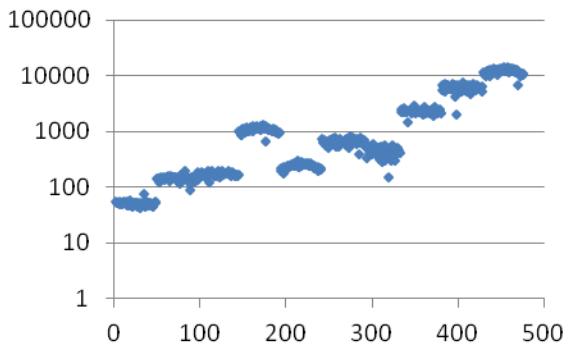

**B2\_04T328\_14110832**

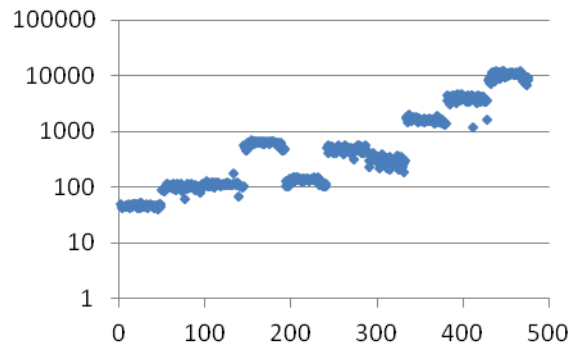

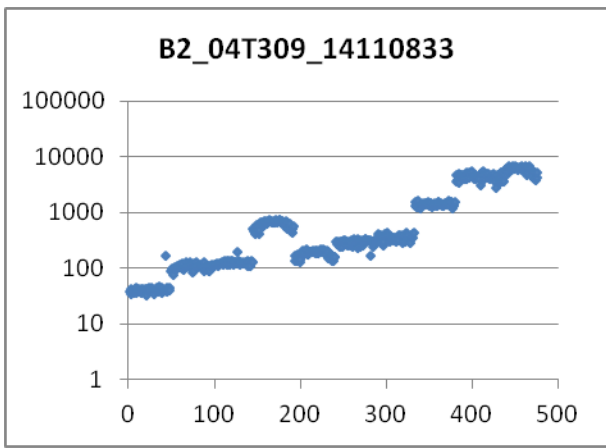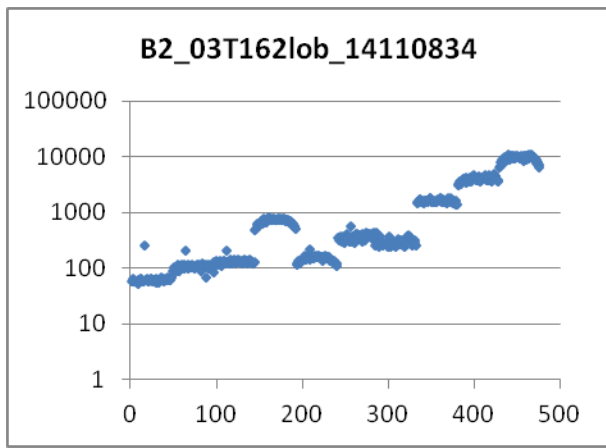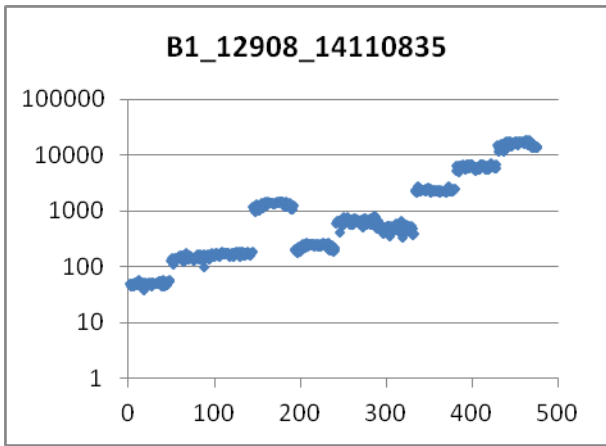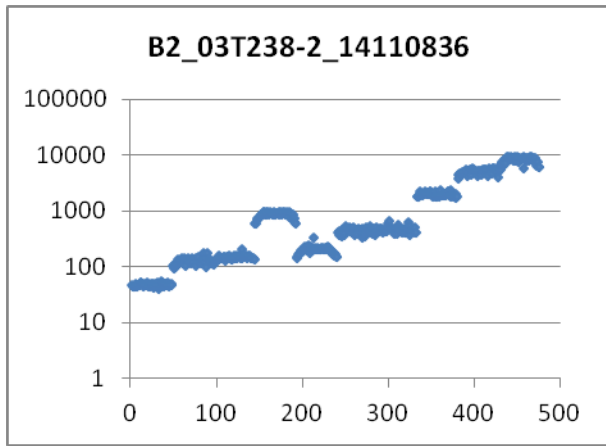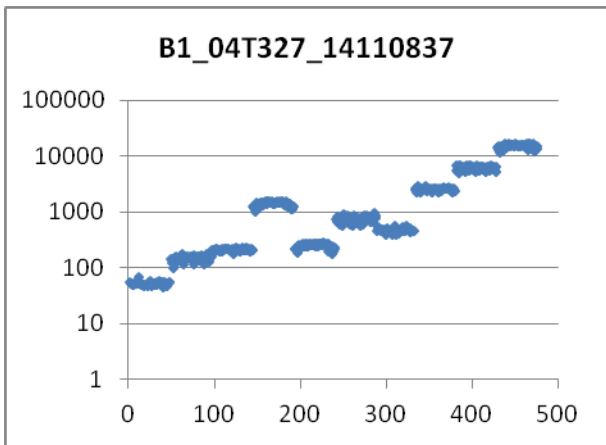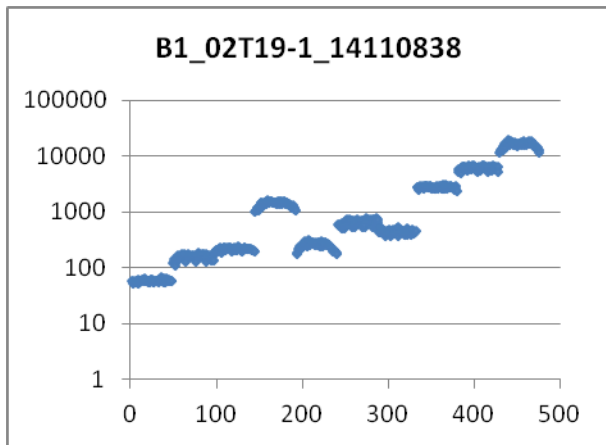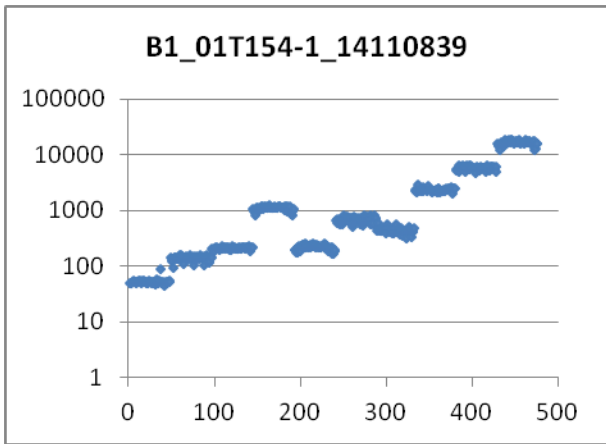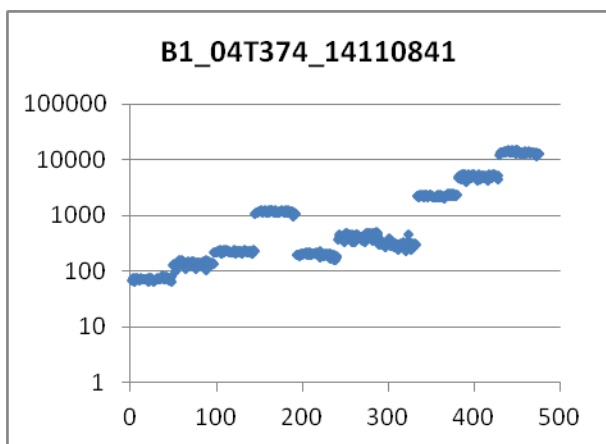

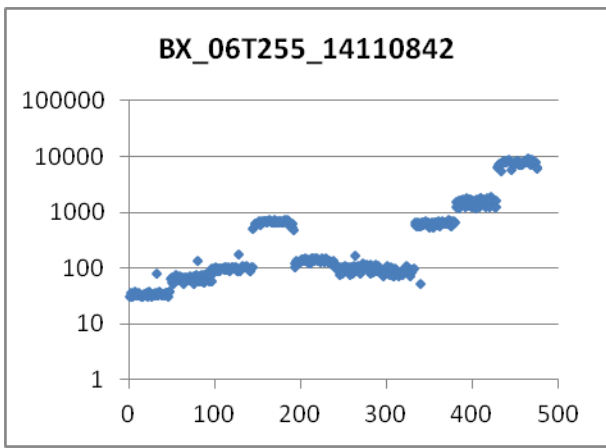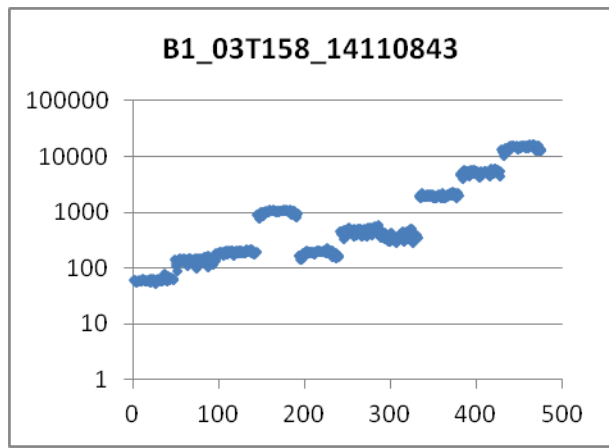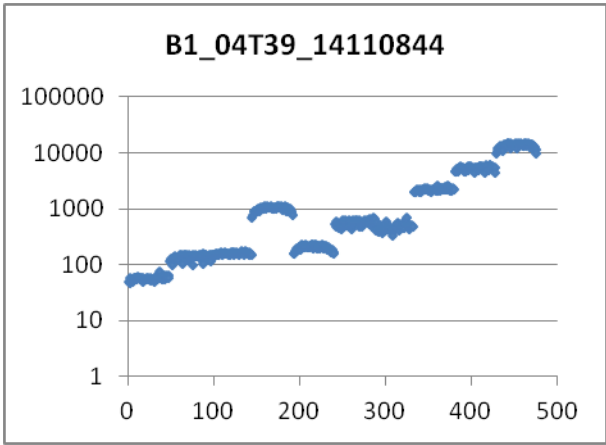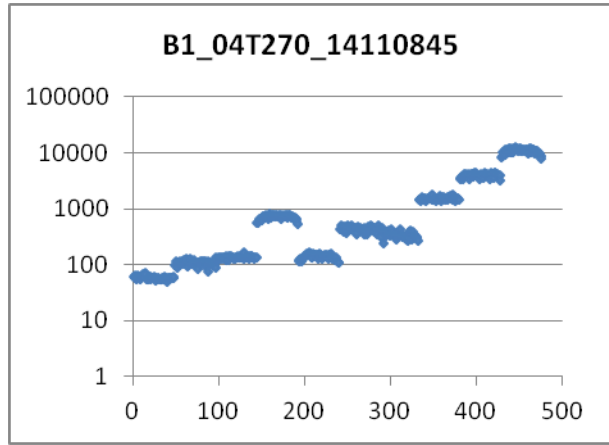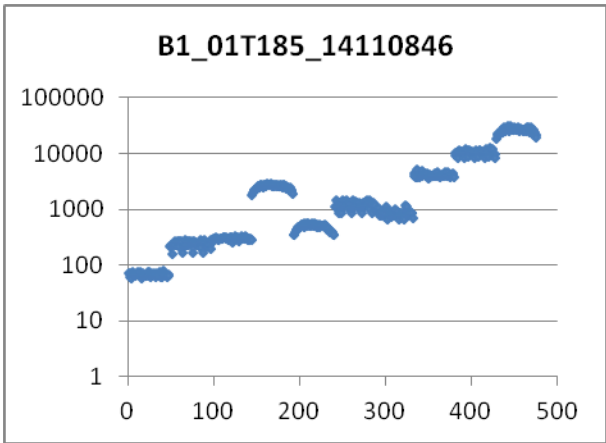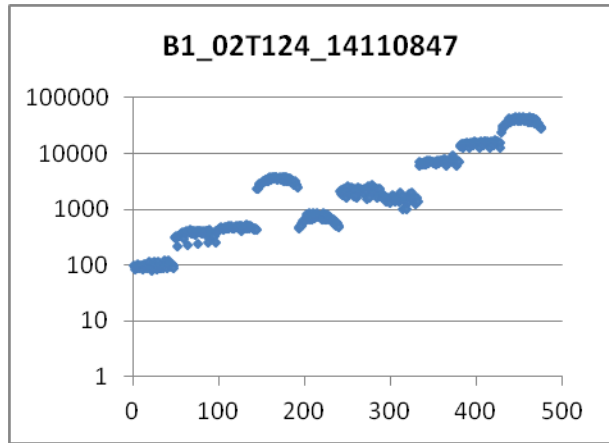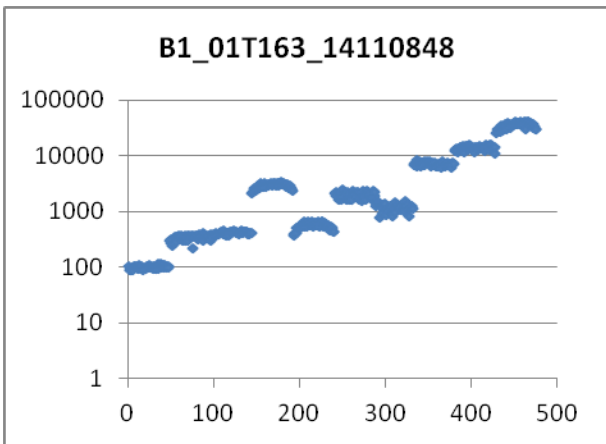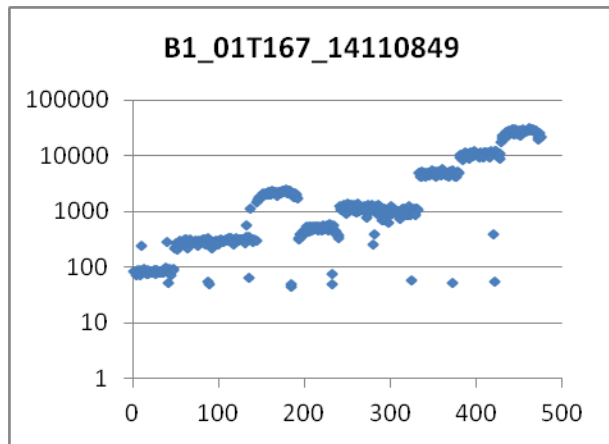

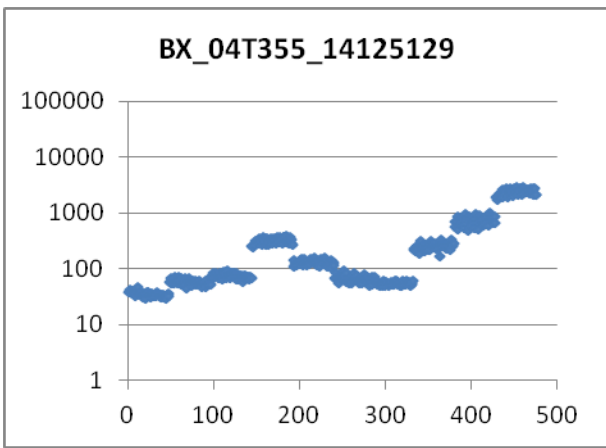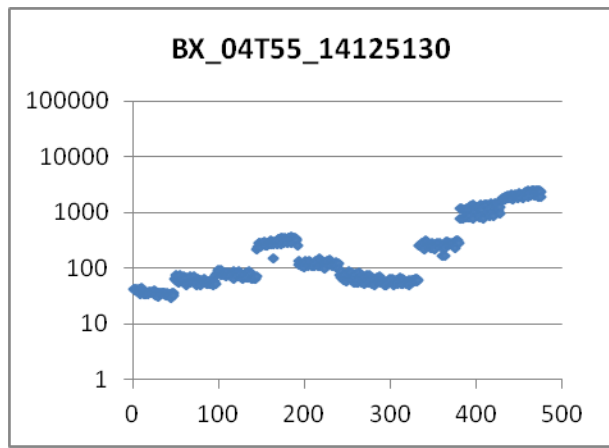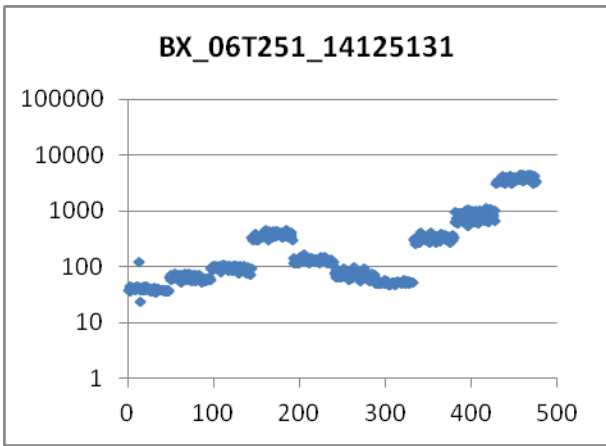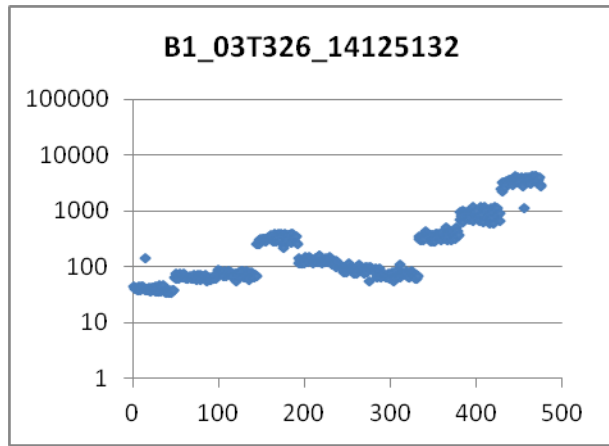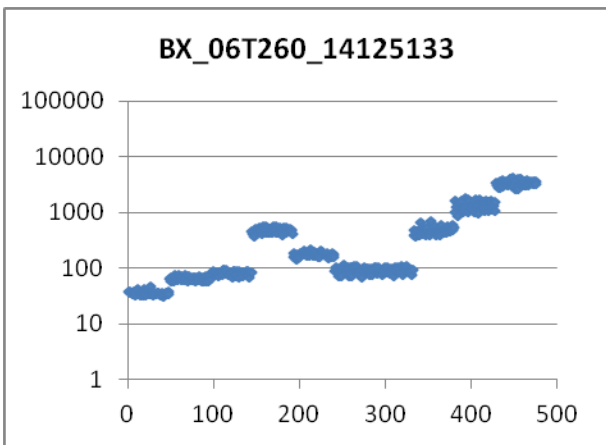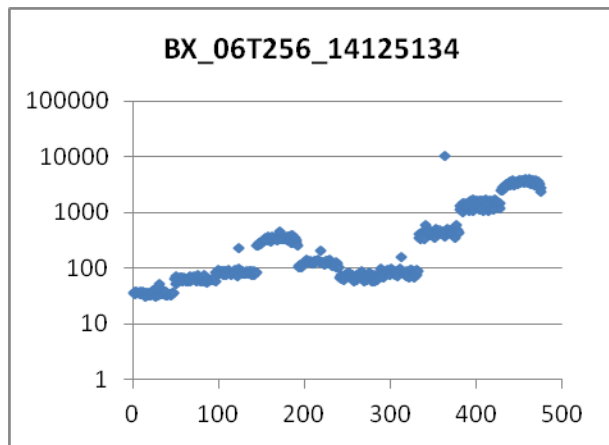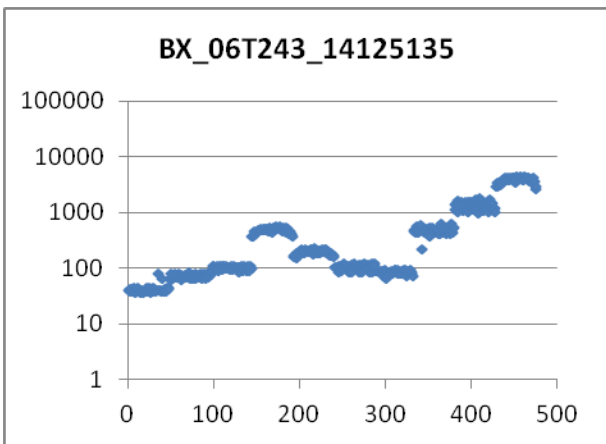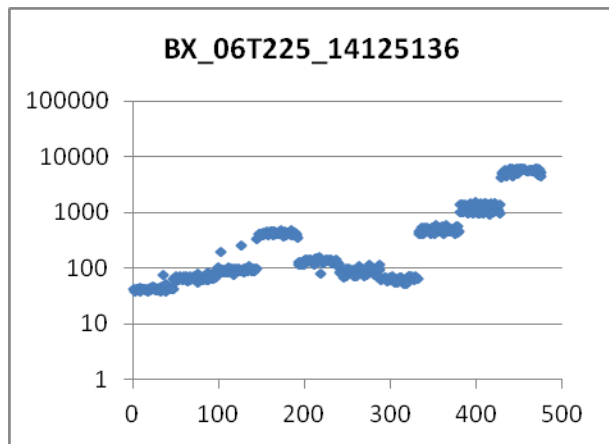

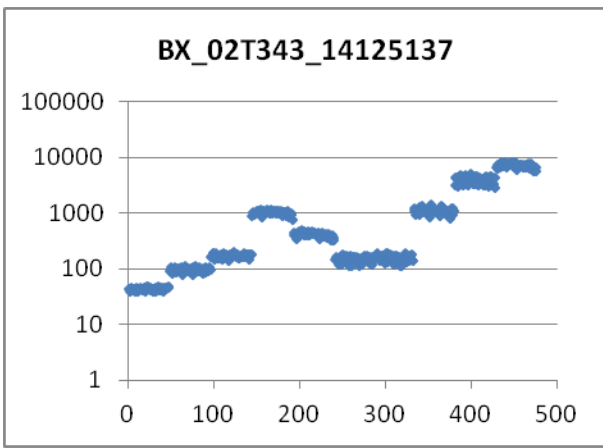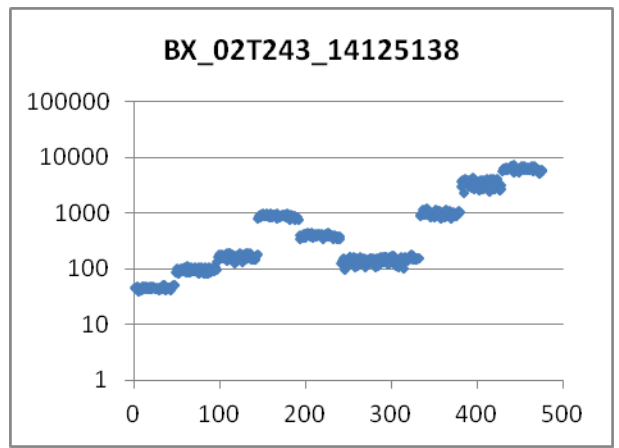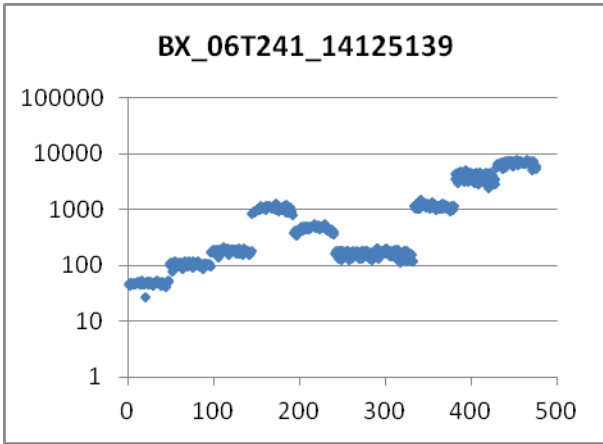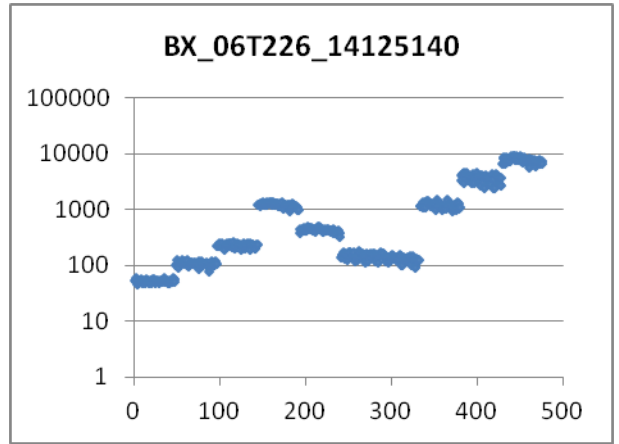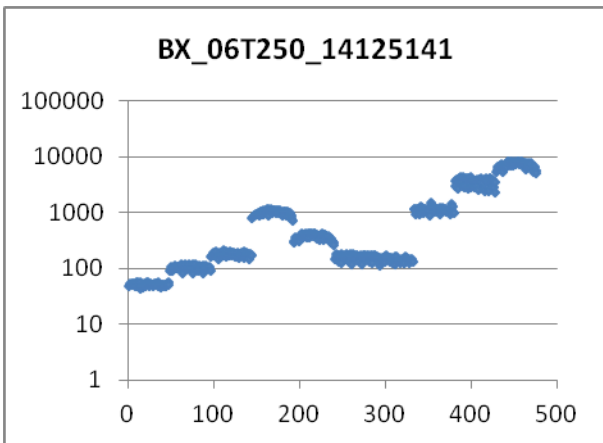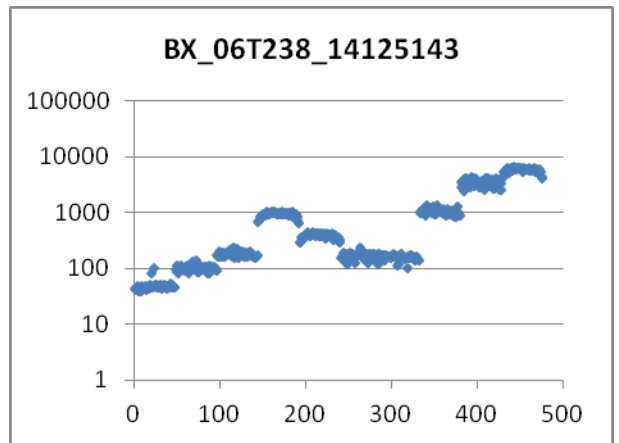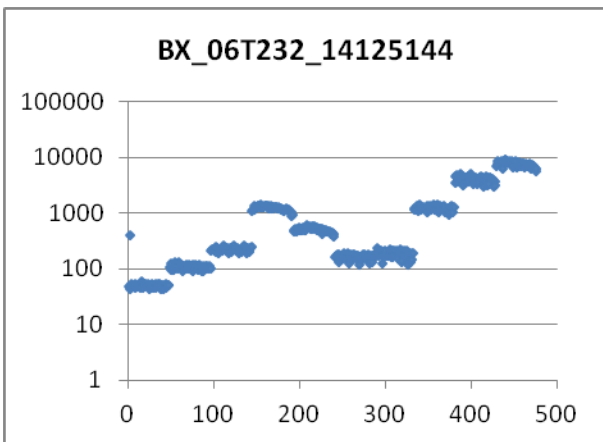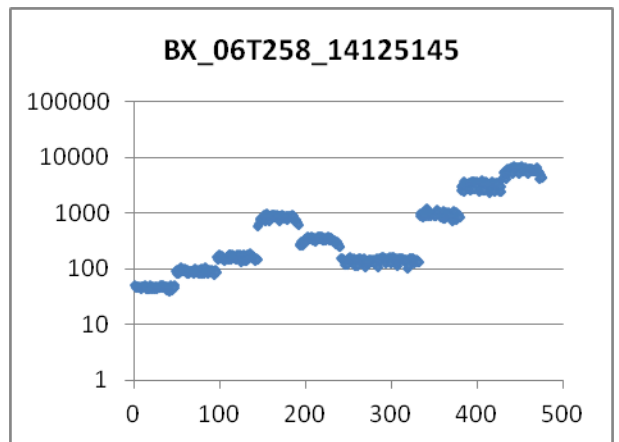

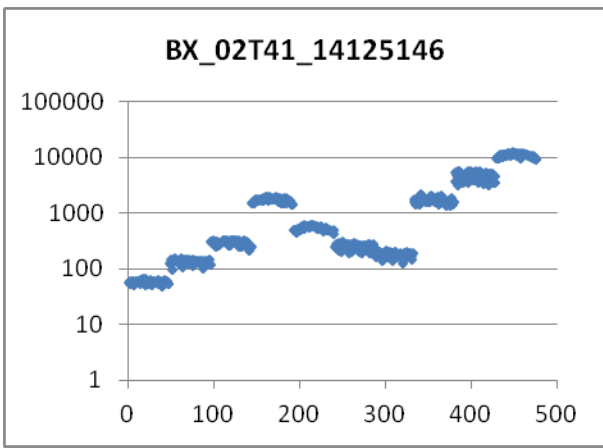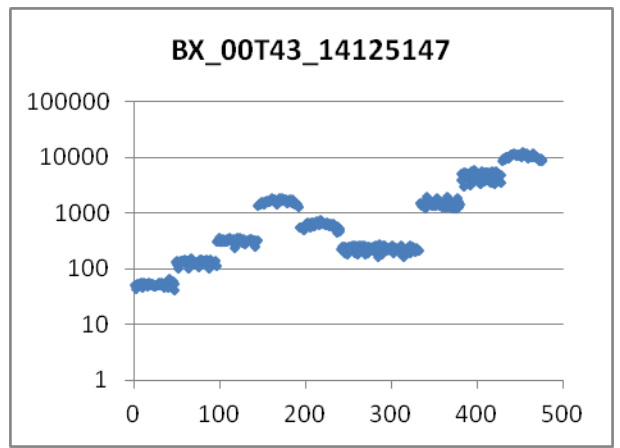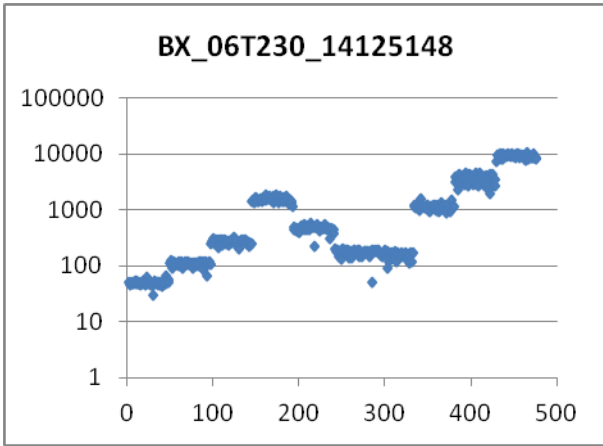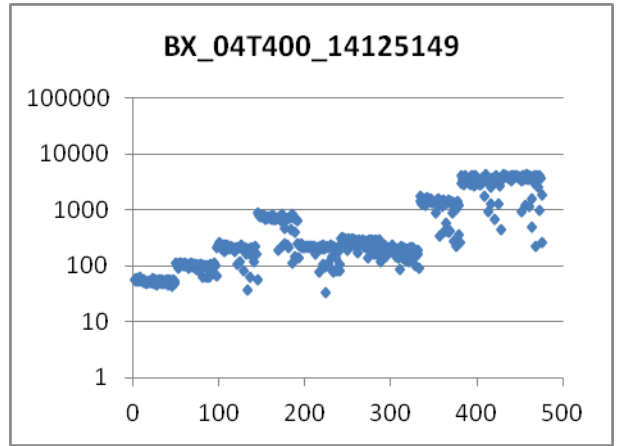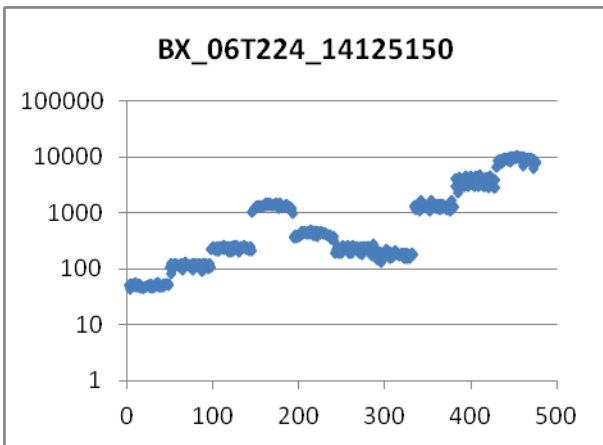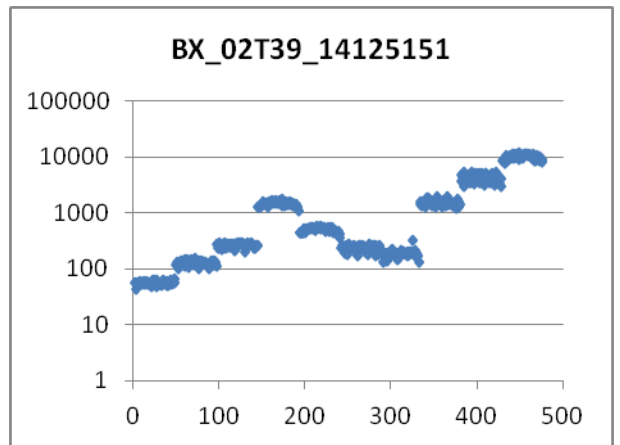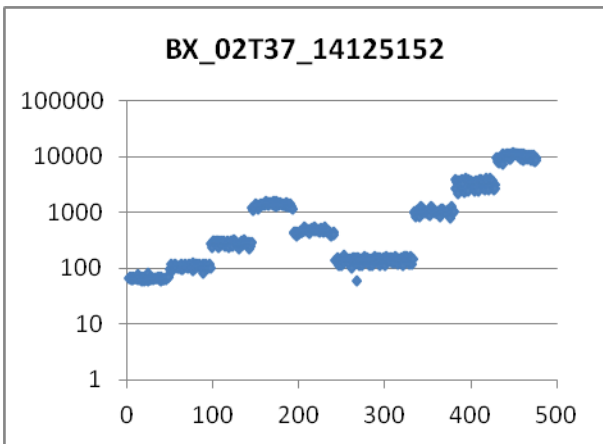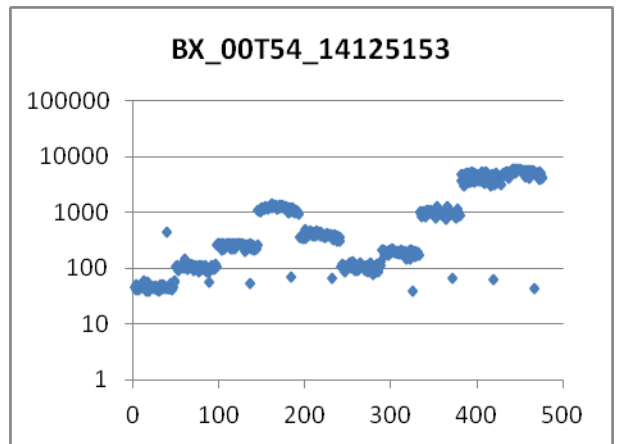

**BX\_11T4\_14125287**

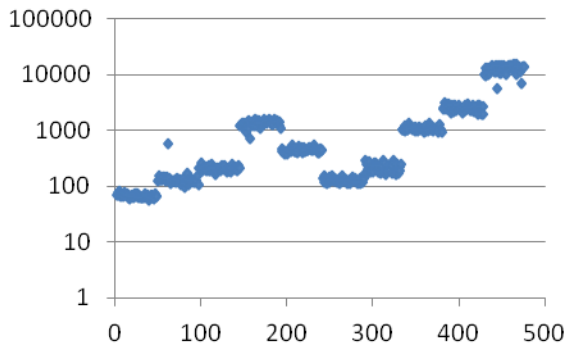

**BX\_11T3\_14125288**

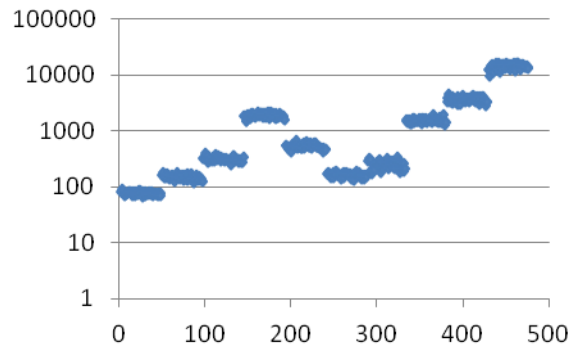

**BX\_10T172\_14125289**

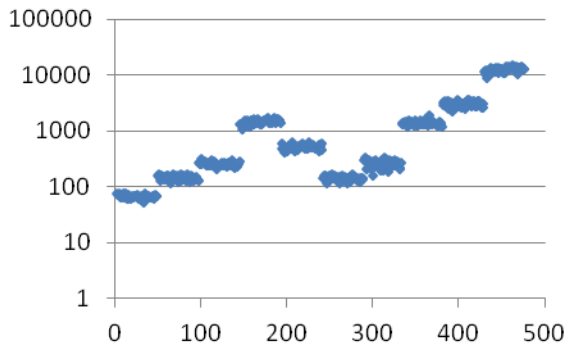

**B2\_10T171\_14125290**

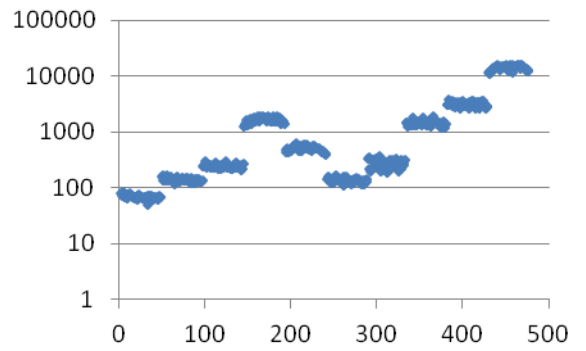

**BX\_10T139\_14125291**

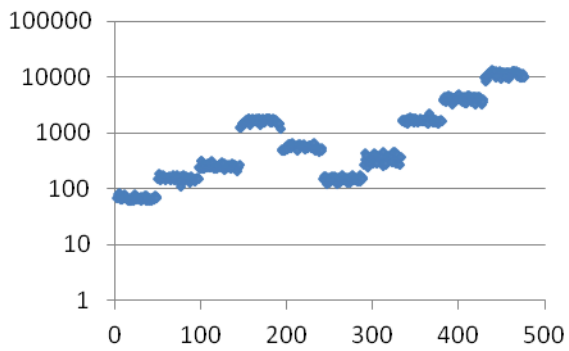

**BX\_10T137-2\_14125293**

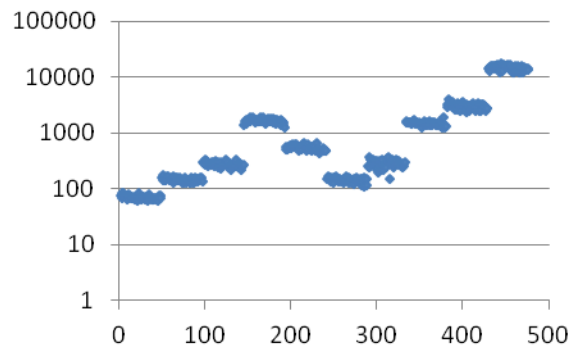

**BX\_10T136\_14125294**

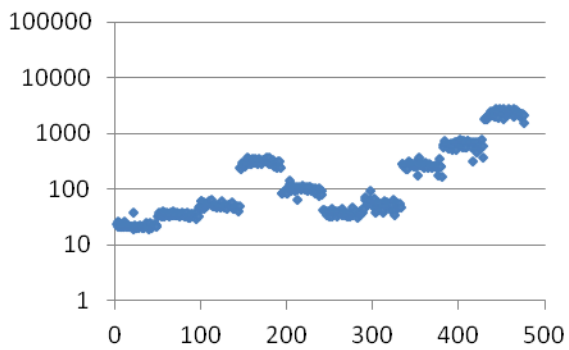

**BX\_10T127\_14125295**

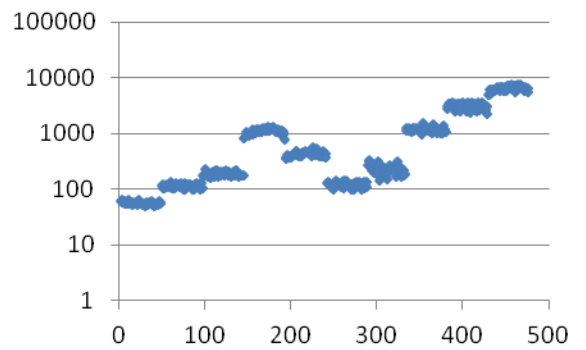

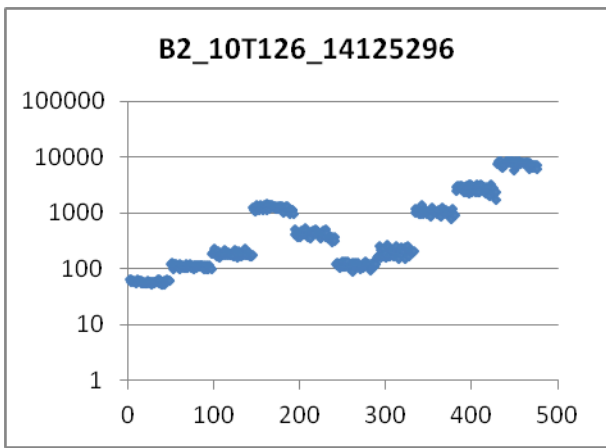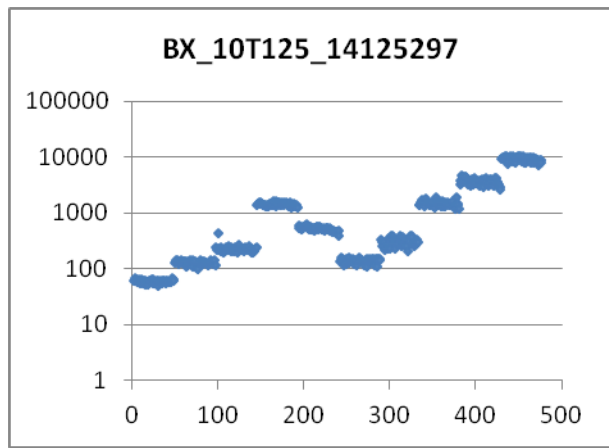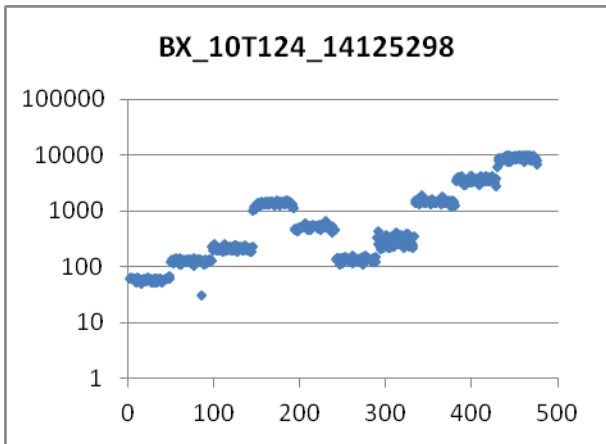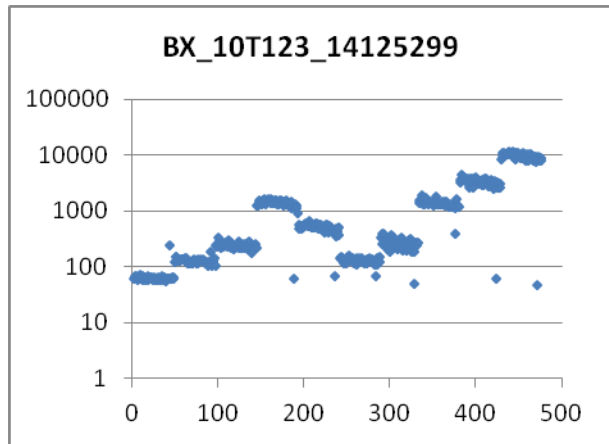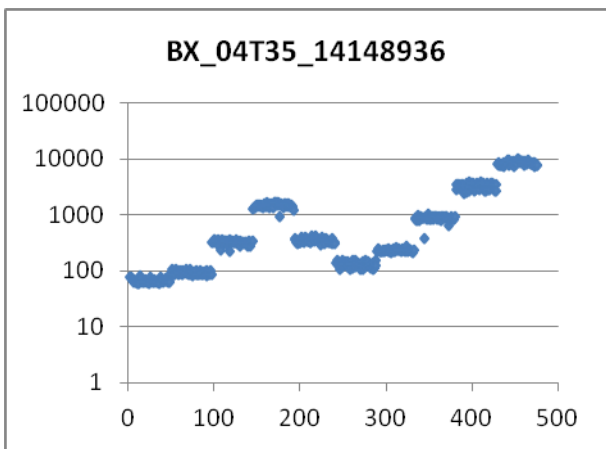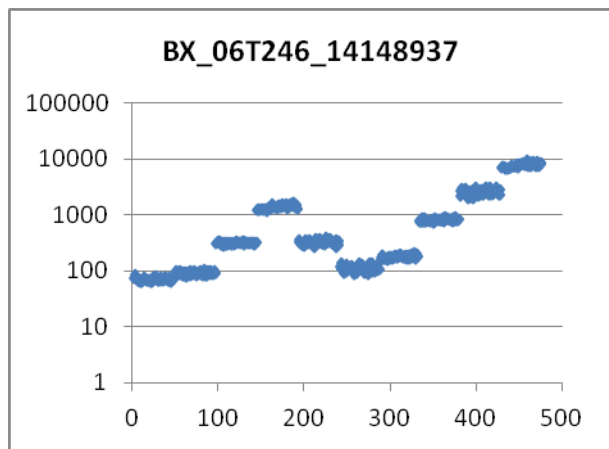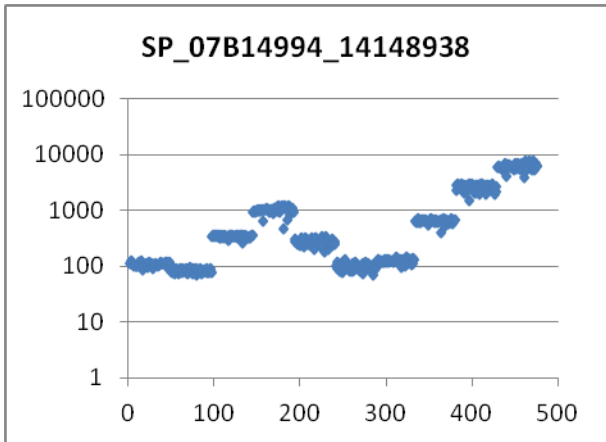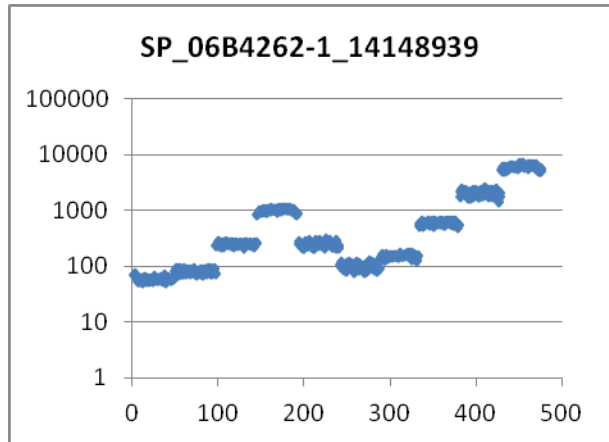



**SP\_06B3216-1\_14148940**

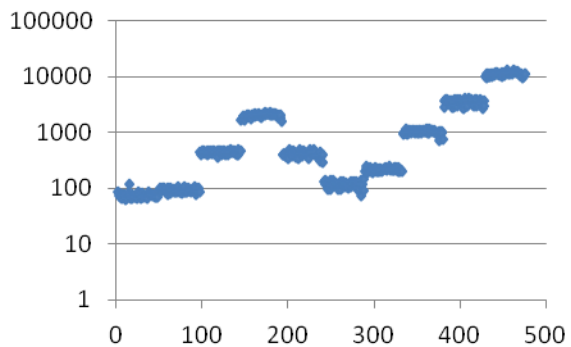

**SP\_06B3175-2\_14148941**

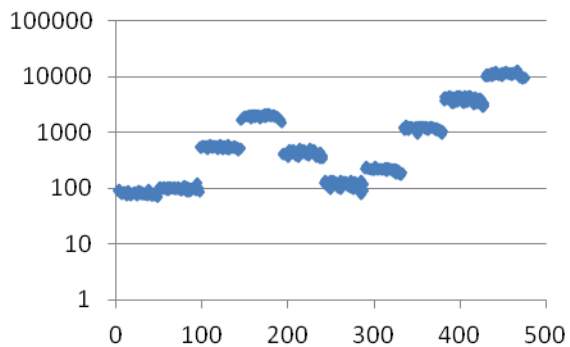

**SP\_06B2896-1\_14148962**

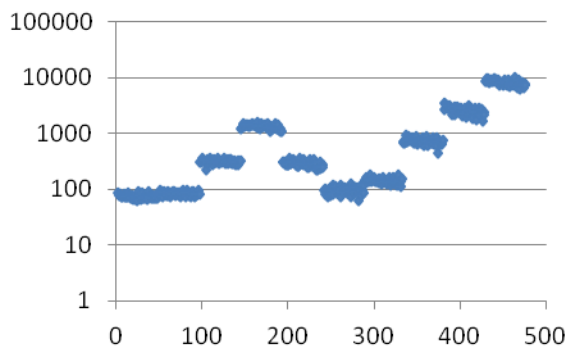

**SP\_06B13844-2\_14148963**

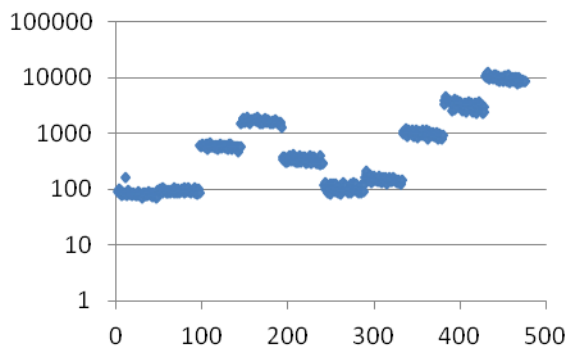

**SP\_05B2981-2\_14148964**

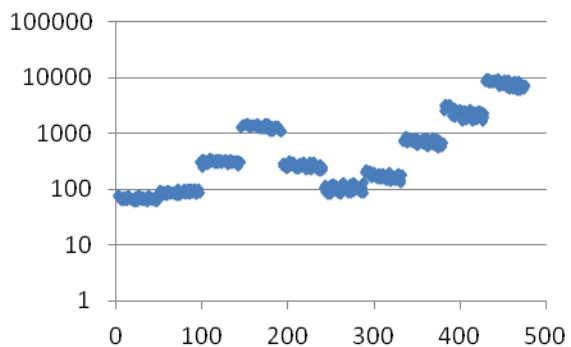

**SP\_04B704-5\_14148965**

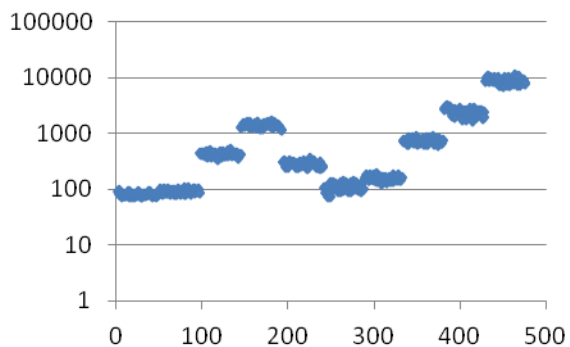

**SP\_01B1178-2\_14148966**

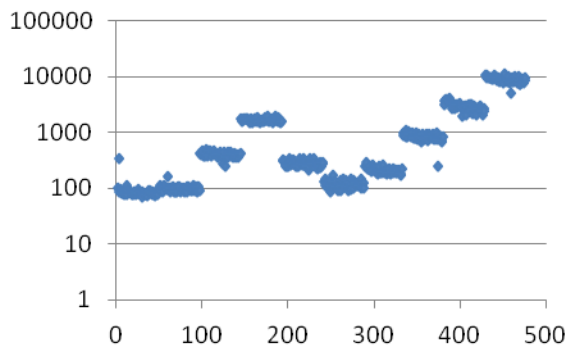

**SP\_92B3505-4\_14148967**

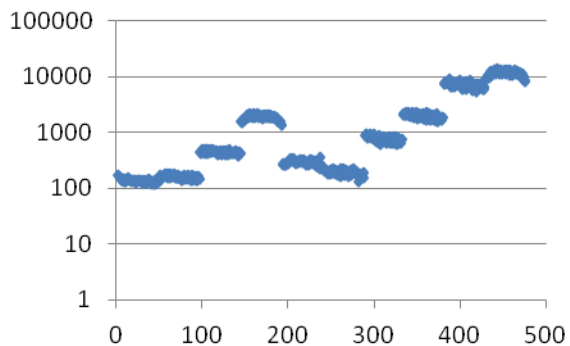

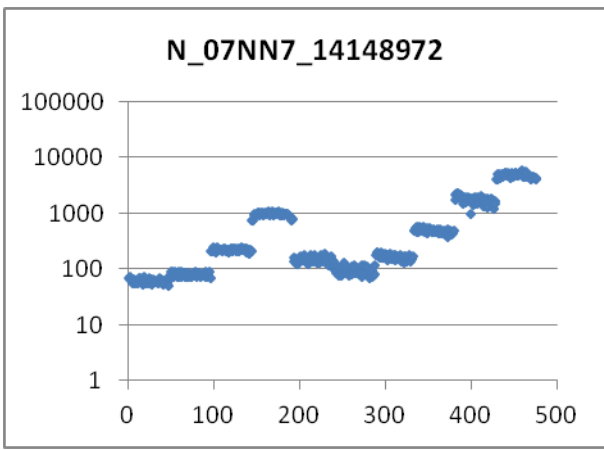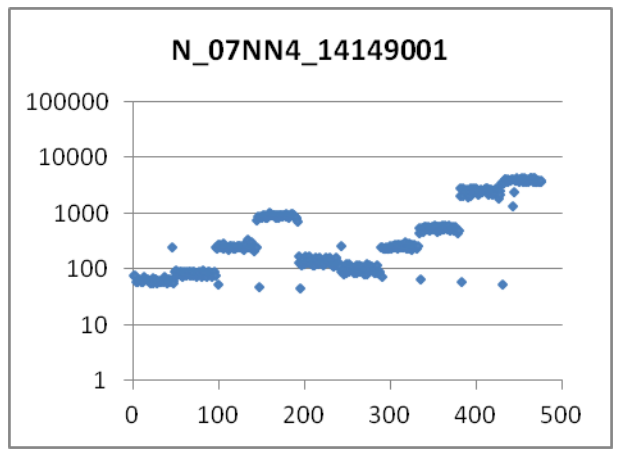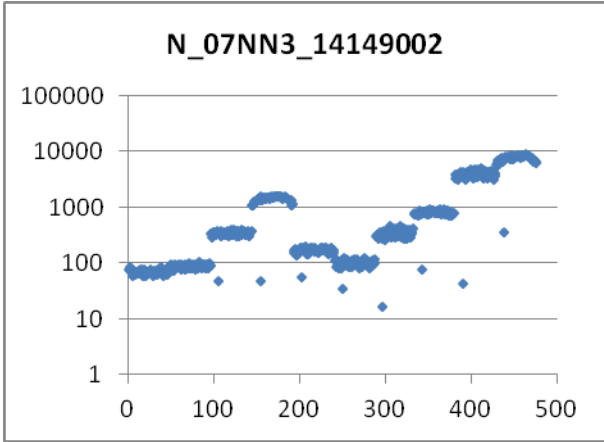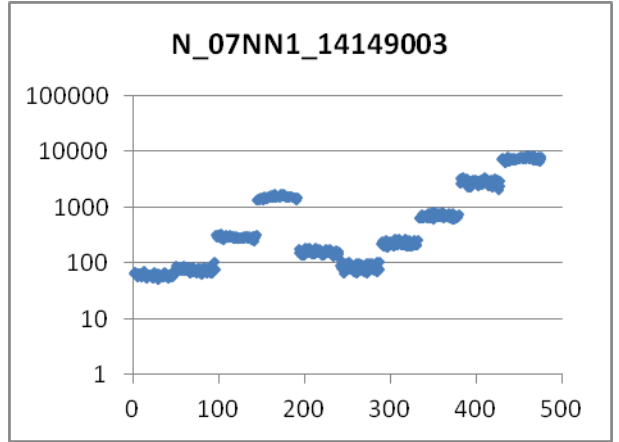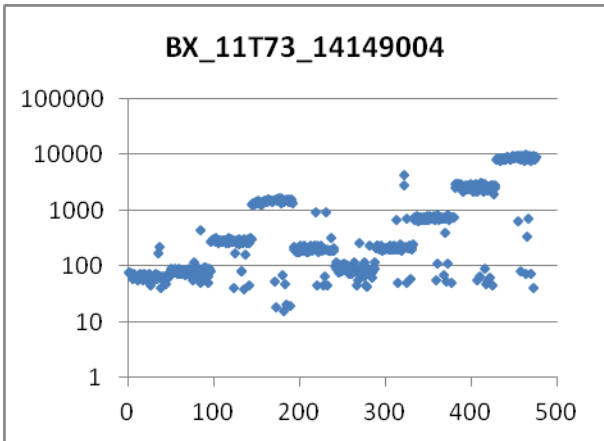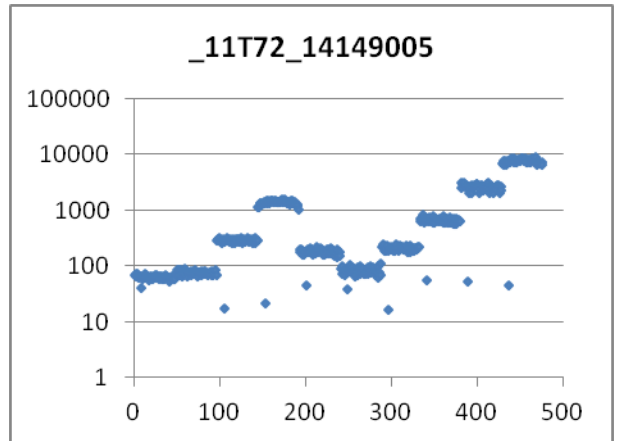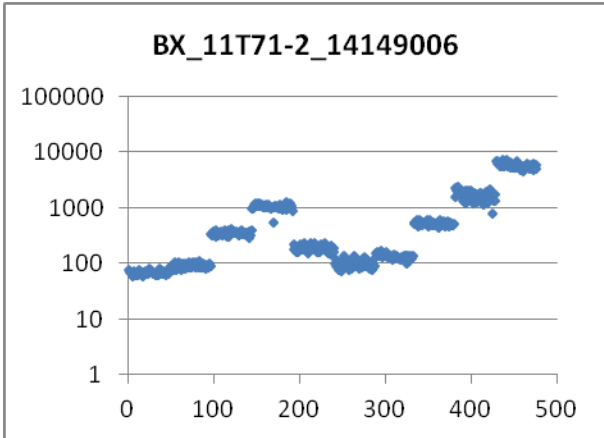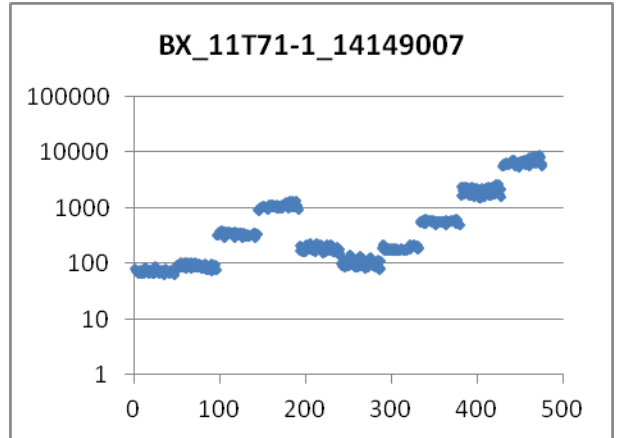

Supplement: mmc2.pdf [file mmc2.pdf]
